# Supplementary material for: Enzymatic Hydrolysis of Bacterial Cellulose for the Production of Nanocrystals for the Food Packaging Industry
Source: Nanomaterials (Basel). 2020 Apr 11;10(4):735. doi: 10.3390/nano10040735 (PMC7221805; doi:10.3390/nano10040735)
Supplement: Supplementary file 1 [file nanomaterials-10-00735-s001.pdf]

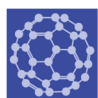

## Supplementary Materials

# Enzymatic Hydrolysis of Bacterial Cellulose for the Production of Nanocrystals for the Food Packaging Industry

Cesare Rovera <sup>1</sup>, Filippo Fiori <sup>1</sup>, Silvia Trabattoni <sup>2</sup>, Diego Romano <sup>1,3</sup>, and Stefano Farris <sup>1,3,\*</sup>

<sup>1</sup> DeFENS, Department of Food, Environmental and Nutritional Sciences, University of Milan, via Celoria 2, 20133 Milan, Italy; cesare.rovera@unimi.it (C.R.); filippo.fiori@studenti.unimi.it (F.F.); diego.romano@unimi.it (D.R.)

<sup>2</sup> Department of Materials Science, University of Milano Bicocca, via Cozzi 55, 20125 Milan, Italy; silvia.trabattoni@unimib.it

<sup>3</sup> INSTM, National Consortium of Materials Science and Technology, Local Unit University of Milan, via Celoria 2, 20133 Milan, Italy

\* Correspondence: stefano.farris@unimi.it; Tel.: +39-25-031-6805

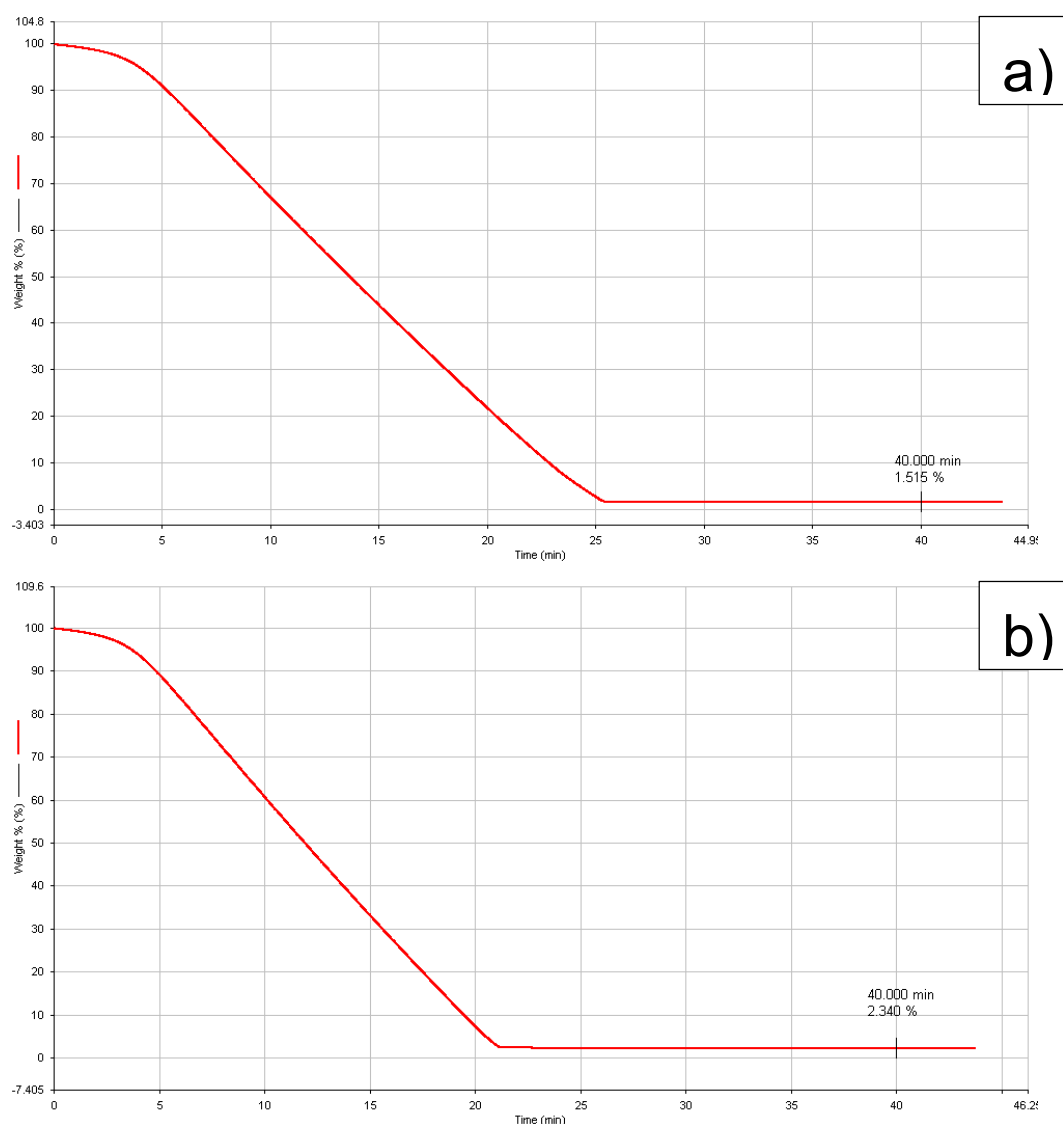

**Figure S1.** Thermogravimetric analyses of BC hydrolyzed by EGs (a) and cellulase (b) after filtration (see main text for details).

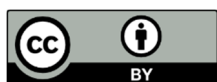

© 2020 by the authors. Submitted for possible open access publication under the terms and conditions of the Creative Commons Attribution (CC BY) license (<http://creativecommons.org/licenses/by/4.0/>).
